# Supplementary material for: GSK-3β-induced Tau pathology drives hippocampal neuronal cell death in Huntington's disease: involvement of astrocyte–neuron interactions
Source: PubMed Central journal article supplement (PMC4855649; doi:10.1038/cddis.2016.104), 2016-04-28
Supplement: cddis2016104x2.pdf [file cddis2016104x2.pdf]

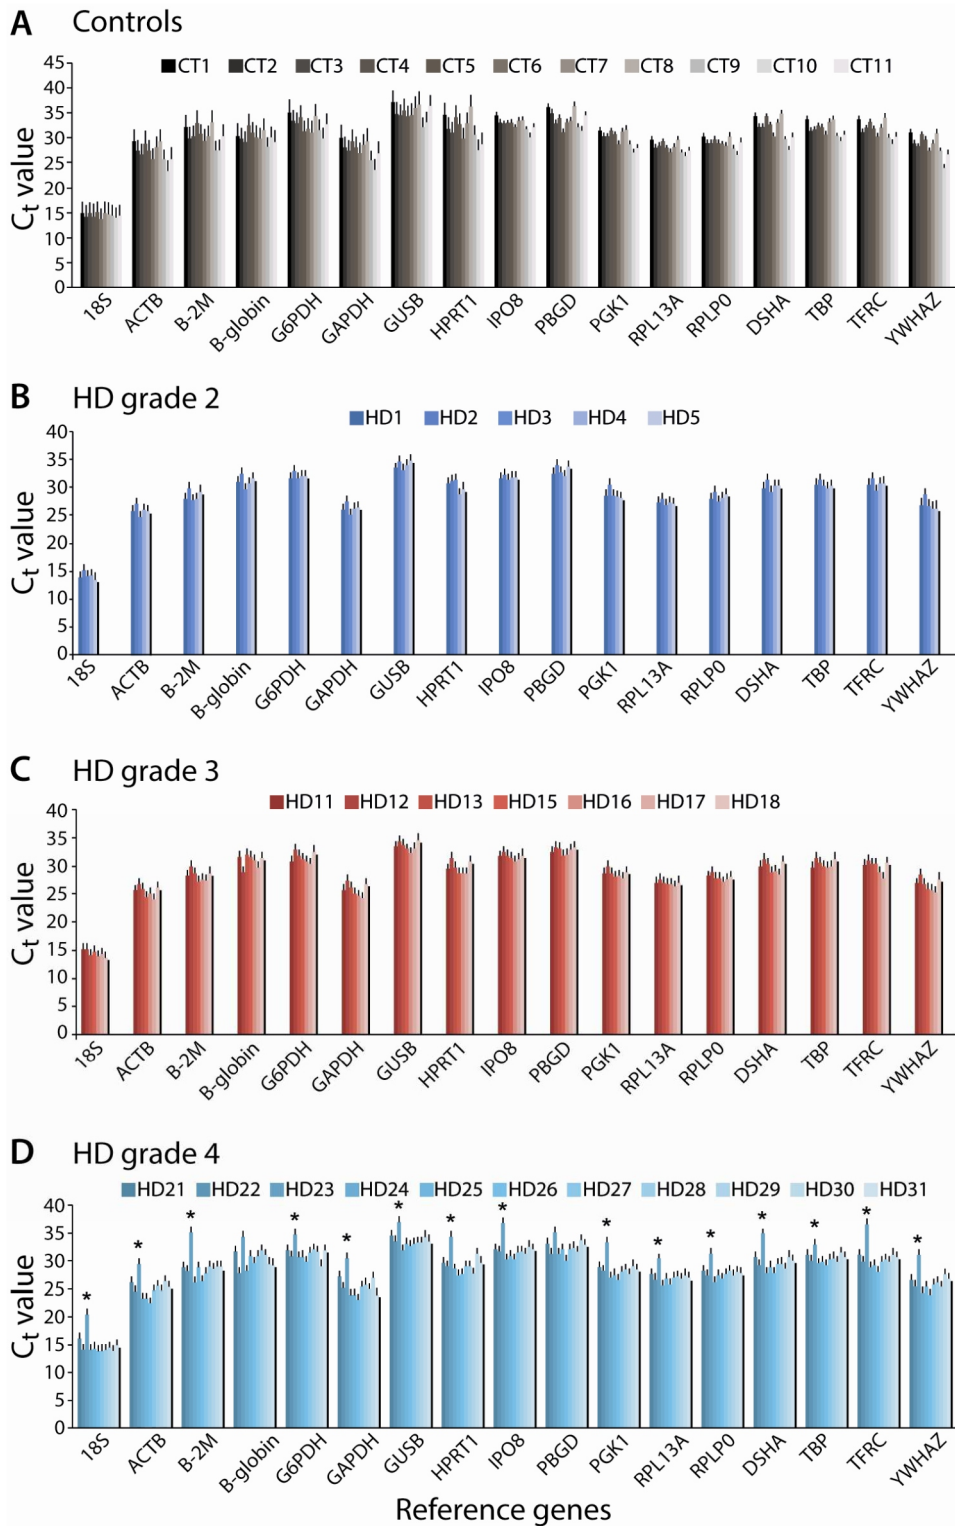

Supplemental Figure 1

## GeNorm

### A. All

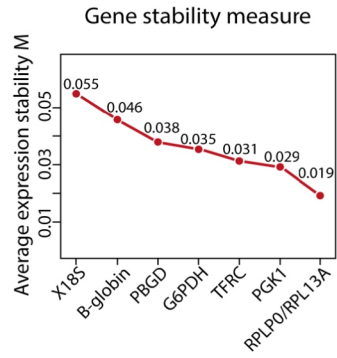

### D. All

#### Optimal number of control genes for normalization

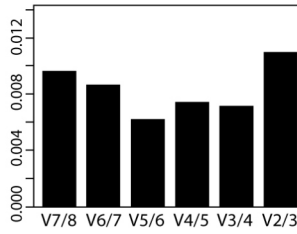

### B. HD cases

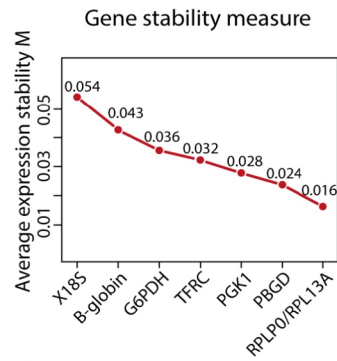

### E. HD cases

#### Optimal number of control genes for normalization

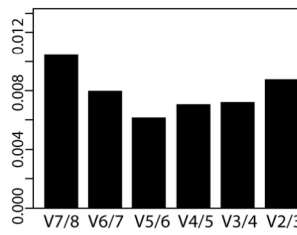

### C. Controls

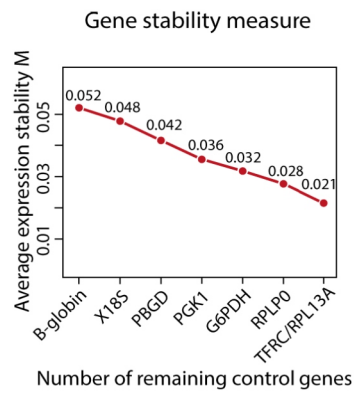

### F. Controls

#### Optimal number of control genes for normalization

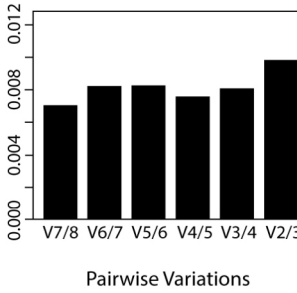

Supplemental Figure 2

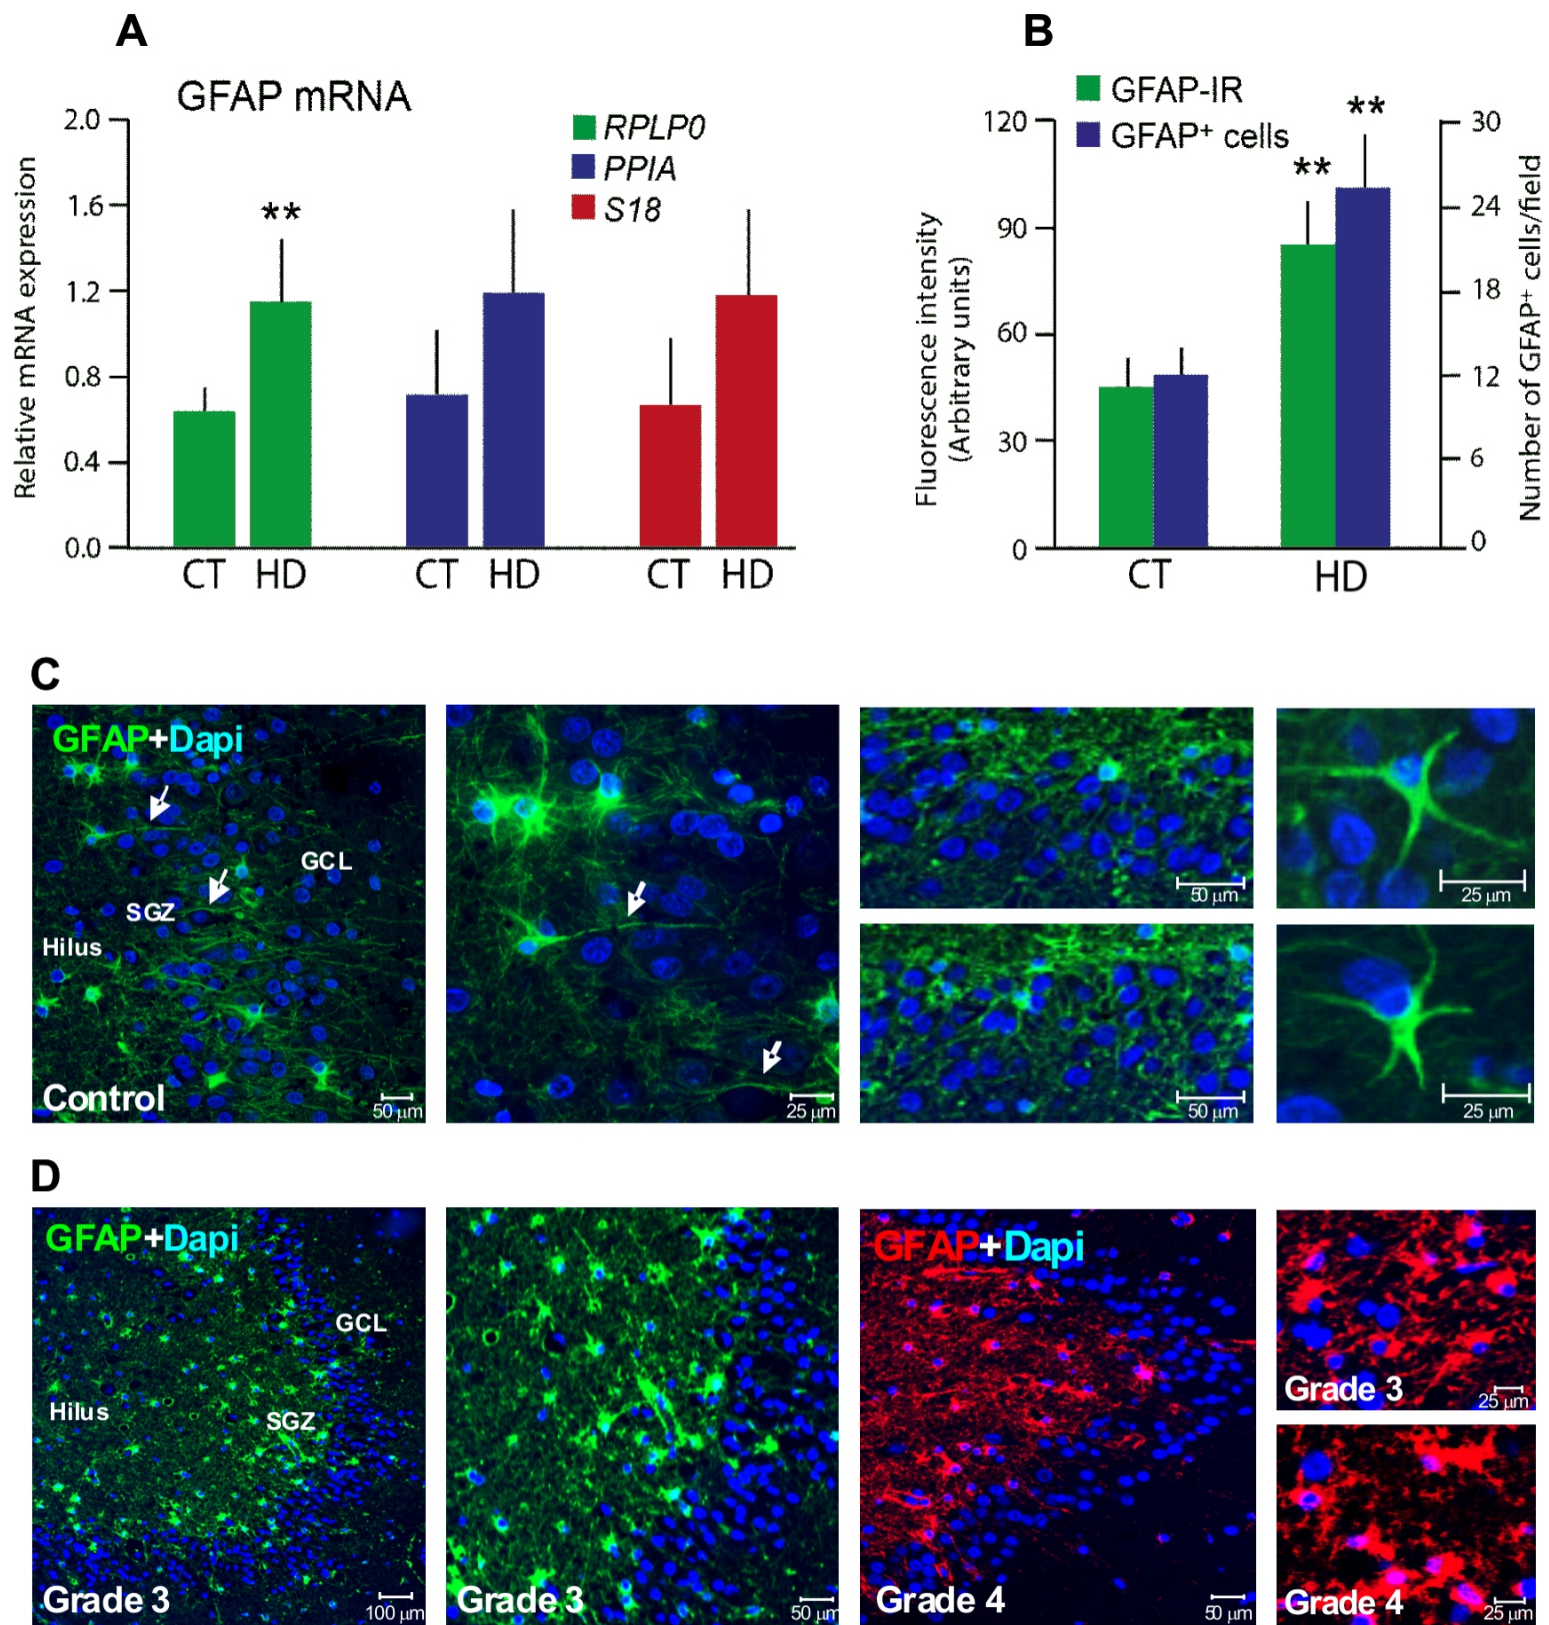

Supplemental Figure 3

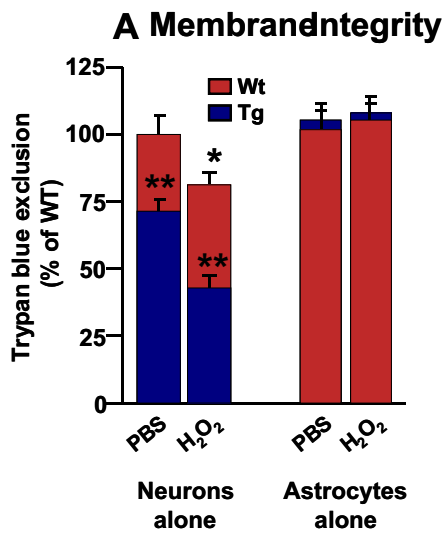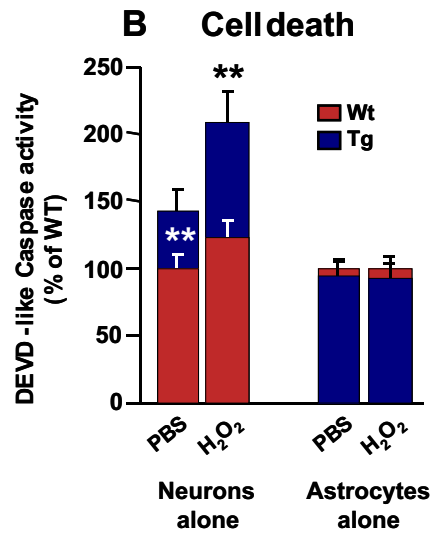

Supplemental Figure 4

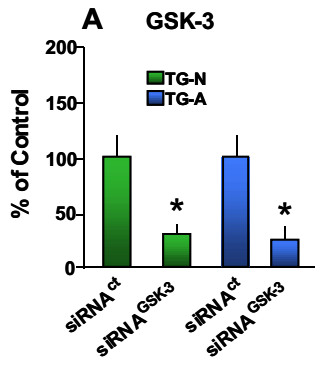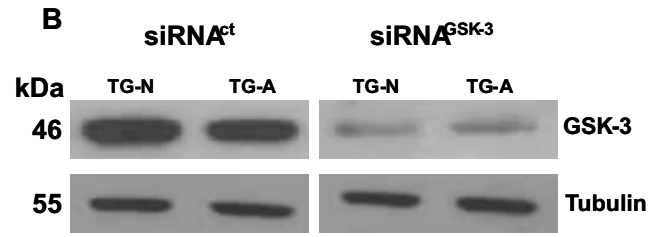

Supplemental Figure 5
